# Supplementary material for: A Novel, Stable, Estradiol-Stimulating, Osteogenic Yam Protein with Potential for the Treatment of Menopausal Syndrome
Source: PubMed Central journal article supplement (PMC5155516; doi:10.1038/srep10179), 2015-07-10
Supplement: srep10179-s1.pdf [file srep10179-s1.pdf]

## SUPPLEMENTARY INFORMATION

### **A Novel, Stable, Estradiol-Stimulating, Osteogenic Yam Protein with Potential for the Treatment of Menopausal Syndrome**

Kam Lok WONG<sup>1</sup>, Yau Ming LAI<sup>2</sup>, Ka Wan LI<sup>3</sup>, Kai Fai LEE<sup>4</sup>, Tzi Bun NG<sup>5</sup>, Ho Pan CHEUNG<sup>1</sup>, Yan Bo ZHANG<sup>1</sup>, Lixing LAO<sup>1</sup>, Ricky Ngok-Shun WONG<sup>6</sup>, Pang Chui SHAW<sup>7</sup>, Jack Ho WONG<sup>1,5</sup>, Zhang Jin ZHANG<sup>1</sup>, Jenny Ka Wing LAM<sup>8</sup>, Wencai YE<sup>9</sup> & Stephen Cho Wing SZE<sup>1,\*</sup>

**TABLE S1.** Summary of the purification of DOI.

| Purification steps                                                                  | Total protein (mg)/100 g<br><i>Dioscorea opposita</i> | Protein yield (%) |
|-------------------------------------------------------------------------------------|-------------------------------------------------------|-------------------|
| Homogenate                                                                          | 165.19                                                | 100               |
| Supernatant after ammonium sulfate precipitation, dialysis, and ultracentrifugation | 72.96                                                 | 44.17             |
| fraction D3                                                                         | 13.12                                                 | 7.94              |
| fraction P1                                                                         | 6.48                                                  | 3.93              |
| fraction S1 (DOI)                                                                   | 0.60                                                  | 0.36              |

**TABLE S2.** Calculation of the molecular weight of DOI (32.5 kDa) by size-exclusion chromatography.

| Sample/marker         | Retention volume (ml) | Kav  | Molecular weight (MW, kDa) | log MW |
|-----------------------|-----------------------|------|----------------------------|--------|
| Superdex 75 10/300 GL |                       |      |                            |        |
| Bed volume (ml)       | 18.8                  |      |                            |        |
| Void volume (ml)      | 7.5                   |      |                            |        |
| Bovine serum albumin  | 9.35                  | 0.16 | 66.0                       | 4.82   |
| Ovalbumin             | 10.12                 | 0.23 | 44.3                       | 4.66   |
| Aprotinin             | 15.25                 | 0.69 | 6.5                        | 3.81   |
| DOI                   | 11.06                 | 0.31 | 32.5                       | 4.51   |

**TABLE S3.** BLAST analysis of the N-terminal sequence of DOI. A high E value ( $>10^{-3}$ ) indicates the N-terminal sequence is novel.

| Protein                                                                                 | Residue no. | Sequence                                                                                          | Residue no. | E-value |
|-----------------------------------------------------------------------------------------|-------------|---------------------------------------------------------------------------------------------------|-------------|---------|
| DOI                                                                                     | 1           | GIGKITTYWGQYSDEPSLTEA                                                                             | 21          | /       |
| allergen Ziz m 1<br>[ <i>Ziziphus mauritiana</i> ]<br>AAX40948.1                        | 25          | Query 2 IGKITTYWGQY--SDEPSLTEA 21<br>+G I TYWGQY +E SL EA<br>Sbjct 25 VGGIATYWGQYETEETEEGSLAEA 46 | 46          | 0.028   |
| class III chitinase<br>[ <i>Medicago truncatula</i> ]<br>AAQ21404.1                     | 28          | Query 3 GKITTYWGQYSDEPSLTEA 21<br>GKI YWGQ +E L EA<br>Sbjct 28 GKISIIYWGQNGNEGLAEA 46             | 46          | 0.31    |
| putative secreted hydrolase<br>[ <i>Pseudoalteromonas tunicata</i> D2] ZP<br>01135667.1 | 691         | Query 1 GIGKITTYWGQ-----YSDEPS 17<br>GI IT YWGQ YS E S<br>Sbjct 691 GISNITSYWGQGWGWLYSGEAS 713    | 713         | 0.43    |
| msrD protein<br>[ <i>Nocardia seriolae</i> ]<br>BAI22688.1                              | 100         | Query 3 GKITTYWGQYSD 14<br>GKIT YWG YSD<br>Sbjct 100 GKITEYWGNYS 111                              | 111         | 0.6     |
| chitinase-like xylanase inhibitor protein<br>[ <i>Coffea arabica</i> ]<br>ADZ48381.1    | 4           | Query 5 ITTYWGQYSDEPSLTEA 21<br>I TYWGQ DE SL +A<br>Sbjct 4 IATYWGQNTDEGSLEDA 20                  | 20          | 0.61    |
| pathogenesis-related protein 8<br>[ <i>Malus x domestica</i> ]<br>ABC47924.1            | 29          | Query 5 ITTYWGQYSDEPSLTEA 21<br>I TYWGQ +E L EA<br>Sbjct 29 IATYWGQNGNEGLAEA 45                   | 45          | 1.7     |
| acidic class III chitinase<br>[ <i>Rehmannia glutinosa</i> ]<br>AAO47731.1              | 25          | Query 3 GKITTYWGQYSDEPSLTE 20<br>GKI YWGQ +E L E<br>Sbjct 25 GKISIIYWGQNGNEGLAE 42                | 42          | 2.4     |
| transcriptional regulator, AraC family<br>[ <i>Frankia</i> sp. EUN1f] ZP<br>06413816.1  | 121         | Query 6 TTYWGQYSDE 15<br>TTYW QYSDE<br>Sbjct 121 TTYW-QYSDE 129                                   | 129         | 3.4     |

**TABLE S4.** Comparison of the characteristics of proteins isolated from different *Dioscorea* species. The estrogen-stimulating activity of proteins derived from *Dioscorea* species has not yet been reported in any study.

|                                                  | DOI (Our study)                                                 | Dioscorin <sup>25-27</sup>                                | DJ <sup>23</sup>          |
|--------------------------------------------------|-----------------------------------------------------------------|-----------------------------------------------------------|---------------------------|
| Species                                          | <i>Dioscorea opposita</i> Thunb.                                | <i>Dioscorea batatas</i> Decne/ <i>Dioscorea alata</i> cv | <i>Dioscorea japonica</i> |
| Lectin activity                                  | No                                                              | Yes                                                       | N/A                       |
| Antioxidative activity                           | N/A                                                             | Yes                                                       | N/A                       |
| Immunomodulating/ Immunostimulating activity     | Yes                                                             | Yes                                                       | N/A                       |
| Carbonic anhydrase activity                      | N/A                                                             | Yes                                                       | N/A                       |
| Trypsin inhibiting activity                      | N/A                                                             | Yes                                                       | N/A                       |
| N-terminal sequence/ partial amino acid sequence | Yes (E value of N-terminal > 10 <sup>-3</sup> , which is novel) | Yes                                                       | Yes                       |
| Chitinase activity                               | No                                                              | N/A                                                       | Yes                       |
| Estradiol-stimulating activity                   | Yes                                                             | N/A                                                       | N/A                       |
| Molecular weight                                 | 33.5 kDa*                                                       | 31 kDa (Sub-unit)                                         | 28 kDa                    |

\*by mass spectrometry

**TABLE S5.** List of bone microarchitecture parameters used to evaluate bone mineralization and to measure anti-osteoporotic activity<sup>67</sup>

| Abbreviation | Variable                                      | Description                                                                                  | Standard unit |
|--------------|-----------------------------------------------|----------------------------------------------------------------------------------------------|---------------|
| tBMD         | ↑<br>Apparent trabecular bone mineral density | Bone mineral density of the total bone volume including the bone marrow                      | mg/cc of HA   |
| BV/TV        | ↑<br>Bone volume fraction                     | Ratio of the segmented bone volume to the total volume of the region of interest             | %             |
| Tb.N         | ↑<br>Trabecular number                        | Measure of the average number of trabeculae per unit length                                  | 1/mm          |
| Tb.Th        | ↑<br>Trabecular thickness                     | Mean thickness of trabeculae assessed using direct 3D methods                                | mm            |
| Tb.Sp        | ↓<br>Trabecular separation                    | Mean distance between trabeculae assessed using direct 3D methods                            | mm            |
| SMI          | ↓<br>Structure model index                    | An indicator of trabecular structure; SMI = 0 for parallel plates and 3 for cylindrical rods | dimensionless |

FIGURE S1.

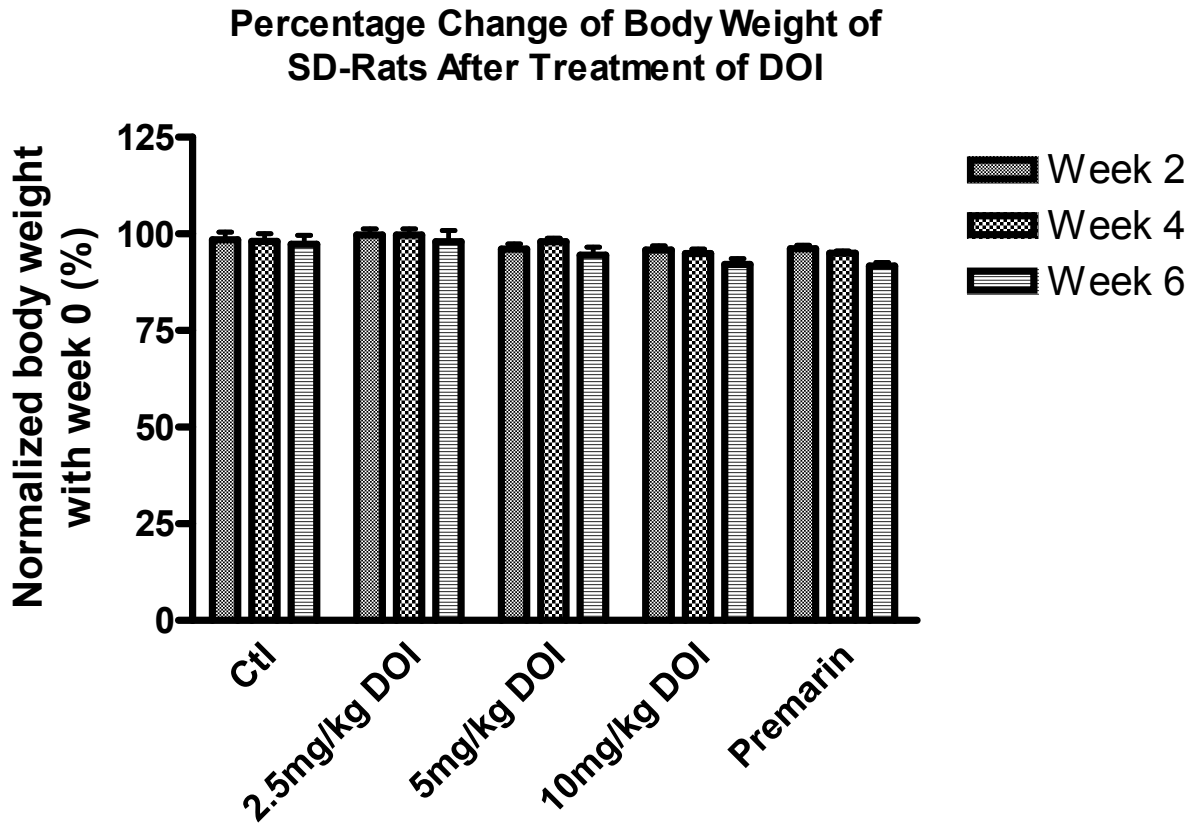

FIGURE S1. Percentage change of body weight in Sprague–Dawley rats after treatment with DOI for 2, 4, and 6 weeks. Results are expressed as means  $\pm$  SEM,  $n=6$ . Ctl: control group received daily intraperitoneal injections of PBS; Premarin: positive control group received daily Premarin (12.4 mg/kg) by oral administration; DOI groups: DOI-treated groups received daily intraperitoneal injections of DOI (2.5, 5, and 10 mg/kg). No statistical significant differences were found among different groups (un-paired  $t$ -test).

FIGURE S2.

### Ovary Weight as Percentage of Body Weight

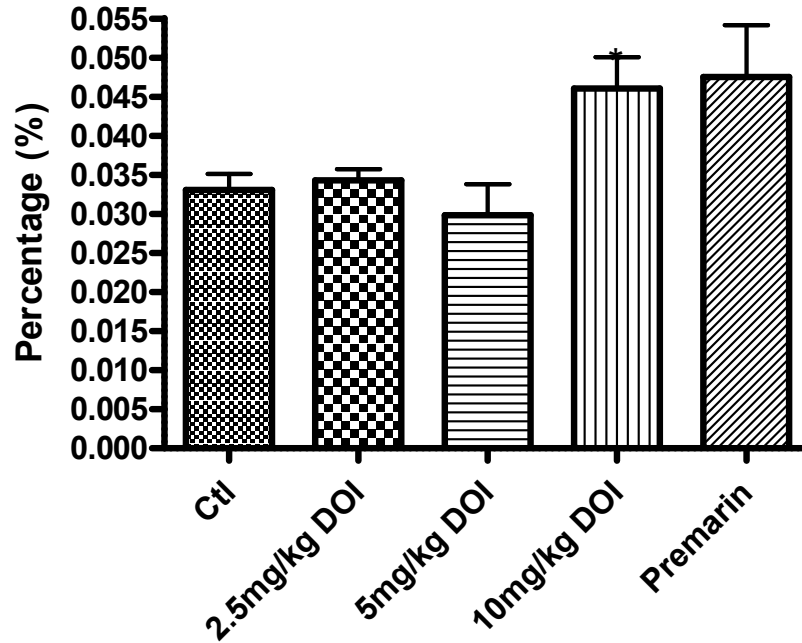

**FIGURE S2.** Ovary weight over body weight of aged female SD-rat after treatment with DOI for 6 weeks. Results are expressed as means  $\pm$  SEM,  $n=6$ .  $*p < 0.05$  compared with week 6 controls (un-paired  $t$ -test). Ctl: control group received daily intraperitoneal injections of PBS; Premarin: positive control group received daily Premarin (12.4 mg/kg) by oral administration; DOI groups: DOI-treated groups received daily intraperitoneal injections of DOI (2.5, 5, and 10 mg/kg).
